# Supplementary material for: Epithelial microRNA-30a-3p targets RUNX2/HMGB1 axis to suppress airway eosinophilic inflammation in asthma
Source: PubMed Central journal article supplement (PMC8800331; doi:10.1186/s12931-022-01933-x), 2022-01-29
Supplement: 12931_2022_1933_MOESM1_ESM.pdf [file 12931_2022_1933_MOESM1_ESM.pdf]

**Additional File 1:**

**Epithelial microRNA-30a-3p targets RUNX2/HMGB1 axis to suppress airway eosinophilia in asthma**

Wenliang Wu<sup>1,2</sup>, Jiali Gao<sup>1,2</sup>, Dian Chen<sup>1,2</sup>, Gongqi Chen<sup>1,2</sup>, Yuchen Feng<sup>1,2</sup>, Chenli Chang<sup>1,2</sup>, Shengchong Chen<sup>1,2</sup>, Lingling Yi<sup>1,2†</sup>, Guohua Zhen<sup>1,2†</sup>

<sup>1</sup>Division of Respiratory and Critical Care Medicine, Department of Internal Medicine, Tongji Hospital, Tongji Medical College, Huazhong University of Science and Technology, Wuhan, China; <sup>2</sup>Key Laboratory of Respiratory Diseases, National Health Commission of People's Republic of China, and National Clinical Research Center for Respiratory Diseases, Wuhan, China

## ADDITIONAL TABLES

**Table S1. Primers for quantitative PCR**

| <b>Gene</b>                     | <b>Species</b> |         | <b>Sequence</b>         |
|---------------------------------|----------------|---------|-------------------------|
| <i>GUSB</i>                     | Human          | Forward | GTCTGCGGCATTTTGTCGG     |
|                                 |                | Reverse | CACACGATGGCATAGGAATGG   |
| <i>RUNX2</i>                    | Human          | Forward | TGGTACTGTCATGGCGGGTA    |
|                                 |                | Reverse | TCTCAGATCGTTGAACCTTGCTA |
| <i>HMGB1</i>                    | Human          | Forward | TGTGCCTCGCTGAGGAAAAAT   |
|                                 |                | Reverse | GGGTGCATTGGGATCCTTGA    |
| <i>CLCA1</i>                    | Human          | Forward | ATGGCTATGAAGGCATTGTCTG  |
|                                 |                | Reverse | TGGCACATTGGGGTCGATTG    |
| <i>POSTN</i>                    | Human          | Forward | GACCGTGTGCTTACACAAATTG  |
|                                 |                | Reverse | AAGTGACCGTCTCTTCCAAGG   |
| <i>SERPINB2</i>                 | Human          | Forward | TCCTGGGTCAAGACTCAAACC   |
|                                 |                | Reverse | CATCCTGGTATCCCCATCTACA  |
| <i><math>\beta</math>-actin</i> | Mouse          | Forward | GTGACGTTGACATCCGTAAAGA  |
|                                 |                | Reverse | GCCGGACTCATCGTACTCC     |
| <i>Runx2</i>                    | Mouse          | Forward | GACTGTGGTTACCGTCATGGC   |
|                                 |                | Reverse | ACTTGGTTTTTCATAACAGCGGA |
| <i>Hmgb1</i>                    | Mouse          | Forward | TGGCTTTTGTCCCTCATCCTT   |
|                                 |                | Reverse | AGAGGCCGCAGTTTCCTATC    |
| <i>Mu5ac</i>                    | Mouse          | Forward | CAGGACTCTCTGAAATCGTACCA |
|                                 |                | Reverse | GAAGGCTCGTACCACAGGG     |

**Table S2. Candidate targets of miR-30a-3p predicted by online algorithms miRanda and TargetScan**

| <b>Gene symbol</b> | <b>Gene ID</b> |
|--------------------|----------------|
| CDC73              | 79577          |
| ZEB2               | 9839           |
| PCLO               | 27445          |
| NBEAL1             | 65065          |
| PANK3              | 79646          |
| CREB1              | 1385           |
| SLC12A6            | 9990           |
| RUNX2              | 860            |
| PRKAA2             | 5563           |
| TBC1D23            | 55773          |
| RGS7BP             | 401190         |
| MED12L             | 116931         |
| ROR1               | 4919           |
| NEGR1              | 257194         |
| UBE2G1             | 7326           |
| RALA               | 5898           |
| STAU1              | 6780           |
| UBE2J1             | 51465          |
| IGF1               | 3479           |
| COLEC12            | 81035          |
| FAM20B             | 9917           |
| PAIP2              | 51247          |
| SLC36A4            | 120103         |
| CCDC6              | 8030           |
| GPR158             | 57512          |
| SLC25A33           | 84275          |
| ZNHIT6             | 54680          |
| MRPL30             | 51263          |
| HIRA               | 7290           |
| SEMA3C             | 10512          |
| TRMT10B            | 158234         |
| PMEL               | 6490           |
| SLITRK6            | 84189          |
| LSS                | 4047           |
| WDR44              | 54521          |
| PYROXD1            | 79912          |
| MEOX2              | 4223           |
| GPRASP2            | 114928         |
| KIAA1324L          | 222223         |
| SYT4               | 6860           |

|         |           |
|---------|-----------|
| GPR176  | 11245     |
| UFSP2   | 55325     |
| RANBP3L | 202151    |
| GOSR1   | 9527      |
| KANSL1L | 151050    |
| STIM2   | 57620     |
| MAP3K2  | 10746     |
| PHLDA1  | 22822     |
| NOD1    | 10392     |
| ROBO1   | 6091      |
| EGR1    | 1958      |
| SNRK    | 54861     |
| PCSK5   | 5125      |
| RYR3    | 6263      |
| GPR180  | 160897    |
| ZNF827  | 152485    |
| STK38L  | 23012     |
| TCP11L1 | 55346     |
| XPNPEP3 | 63929     |
| RFK     | 55312     |
| SYT14   | 255928    |
| CHURC1  | 91612     |
| RB1     | 5925      |
| POU4F1  | 5457      |
| COL12A1 | 1303      |
| SLC5A3  | 6526      |
| RIF1    | 55183     |
| MEI4    | 101928601 |
| SH3GLB1 | 51100     |
| FXR1    | 8087      |
| HMGN4   | 10473     |
| MTHFD2  | 10797     |
| ELK3    | 2004      |
| FGF7    | 2252      |
| EPAS1   | 2034      |
| TXLNB   | 167838    |
| ATP11C  | 286410    |
| FAM98A  | 25940     |
| RTP4    | 64108     |
| CEP152  | 22995     |
| TOMM20  | 9804      |
| USP1    | 7398      |
| CACYBP  | 27101     |
| TUSC3   | 7991      |

|         |        |
|---------|--------|
| NPHP3   | 27031  |
| CENPL   | 91687  |
| NAPG    | 8774   |
| CHMP1B  | 57132  |
| UBXN2B  | 137886 |
| FAM104A | 84923  |
| CCDC112 | 153733 |
| TRIM72  | 493829 |
| SLC35F3 | 148641 |
| HOXB7   | 3217   |
| ZNF430  | 80264  |
| TMEM47  | 83604  |
| CNPY2   | 10330  |

---

## ADDITIONAL FIGURES

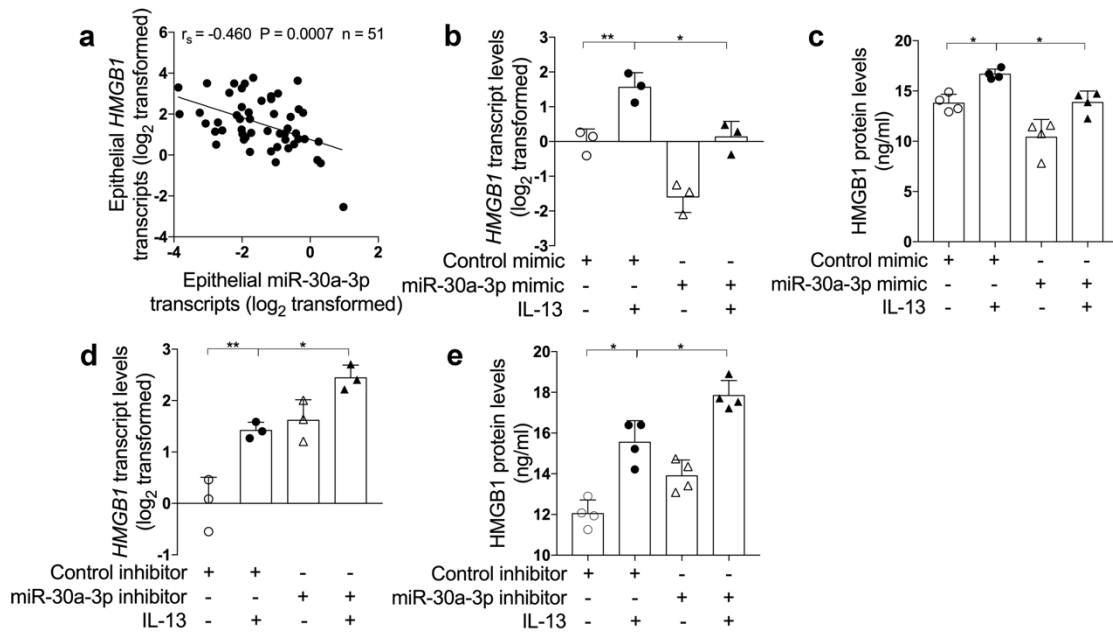

**Figure S1. Inhibition of miR-30a-3p enhances the expression of HMGB1. (a)**

Correlation assays between epithelial transcript levels of has-miR-30a-3p and HMGB1 in asthma patients (n=51). Correlation assays were performed using Spearman's rank-order correlation. **(b-c)** After control or miR-30a-3p mimic transfection with or without IL-13 stimulation, the transcript levels of *HMGB1* **(b)** were determined by quantitative PCR, and the protein levels of HMGB1 **(c)** in cell culture media were determined by ELISA. **(d-e)** After control or miR-30a-3p inhibitor transfection with or without IL-13 stimulation, the transcript levels of *HMGB1* **(d)** were determined by quantitative PCR, and the protein levels of HMGB1 **(e)** in cell culture media were determined by ELISA. The transcript levels were expressed as log<sub>2</sub> transformed and relative to the mean of control group. n = 3~4 wells per group. Data are mean ± SD. \*P<0.05 (one-way ANOVA followed by Tukey's multiple comparison test). The data are representative of three independent experiments.

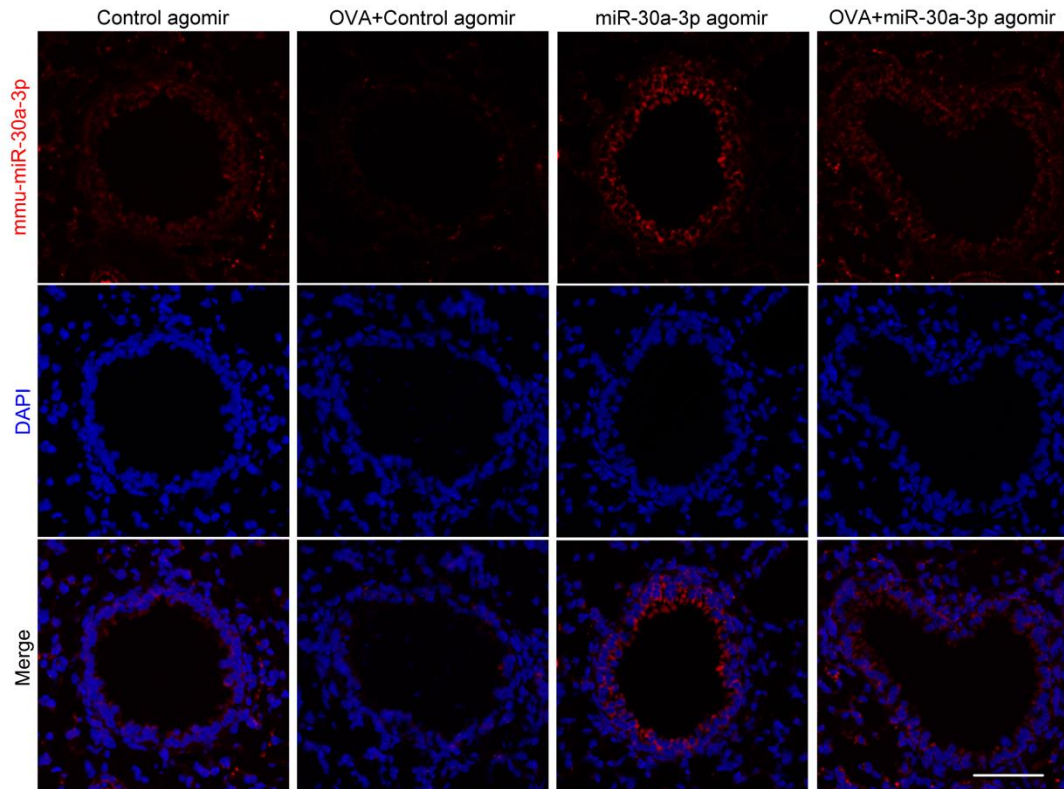

**Figure S2. Mmu-miR-30a-3p agomir is sufficient to abrogate the decrease of the expression of mmu-miR-30a-3p in OVA-challenged mice.** Representative images of fluorescence in situ hybridization of miR-30a-3p in mouse lung sections. Scale bar, 50  $\mu\text{m}$ .

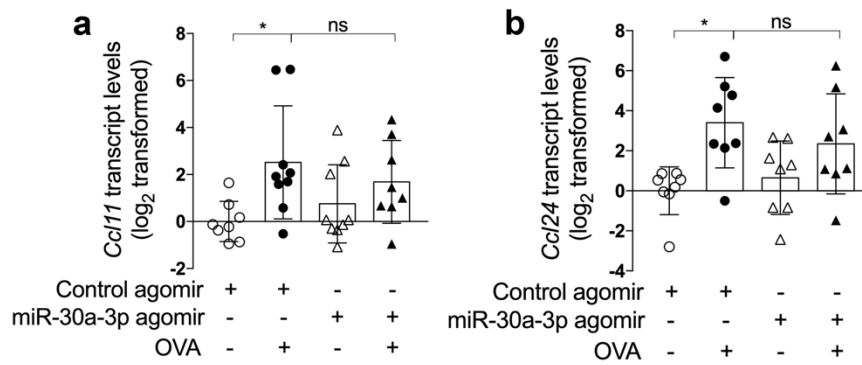

**Figure S3. Mmu-miR-30a-3p overexpression did not affect Ccl11 and Ccl24 expression in mouse lung tissue.** (a) The transcript levels of Ccl11 in mouse lungs were determined by quantitative PCR. (b) The transcript levels of Ccl24 in mouse lungs were determined by quantitative PCR. The transcript levels were expressed as log<sub>2</sub> transformed and relative to the mean of control group. n = 7 - 9 mice per group. Data are mean ± SD. \*P<0.05 (one-way ANOVA followed by Tukey's multiple comparison test).



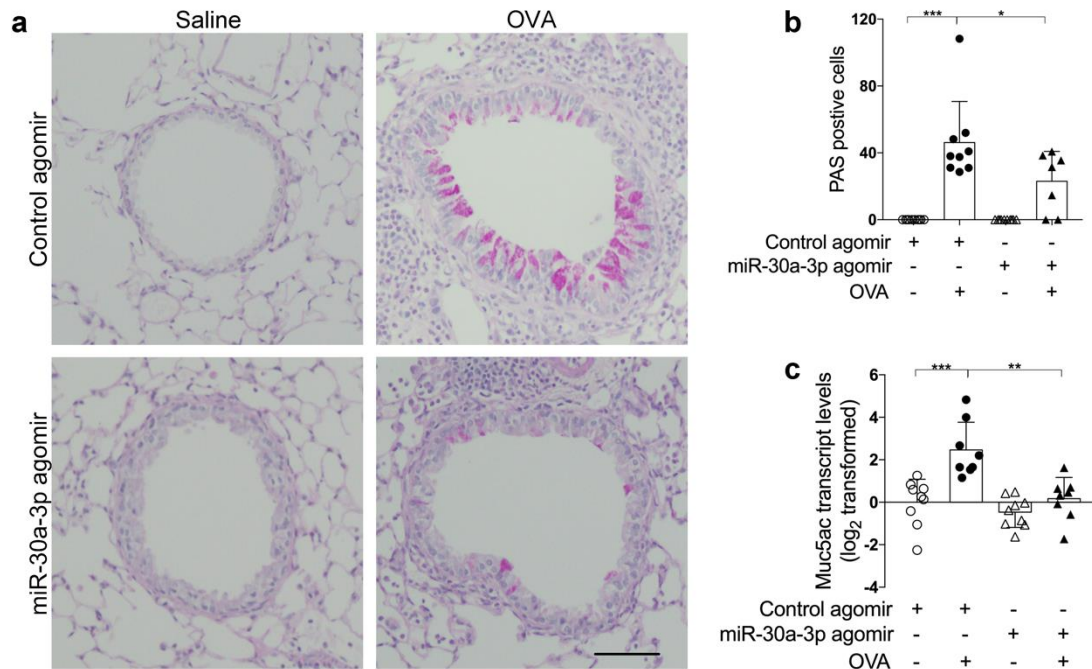

**Figure S4. Mmu-miR-30a-3p overexpression decreased the mucus production in OVA sensitized and challenged mice.** (a) PAS staining for mucus in representative lung sections. Scale bar, 50 $\mu$ m. (b) The numbers of PAS-staining-positive cells were counted in five random fields for each lung section at  $\times 200$  magnification. (c) *Muc5ac* transcripts levels in mouse lungs were determined by quantitative PCR. The transcript level was expressed as log<sub>2</sub> transformed and relative to control. Data are mean  $\pm$  SD. \*\*\* $P < 0.001$ , \*\* $P < 0.01$ , \* $P < 0.05$ . One-way ANOVA followed by Tukey's multiple comparison test.

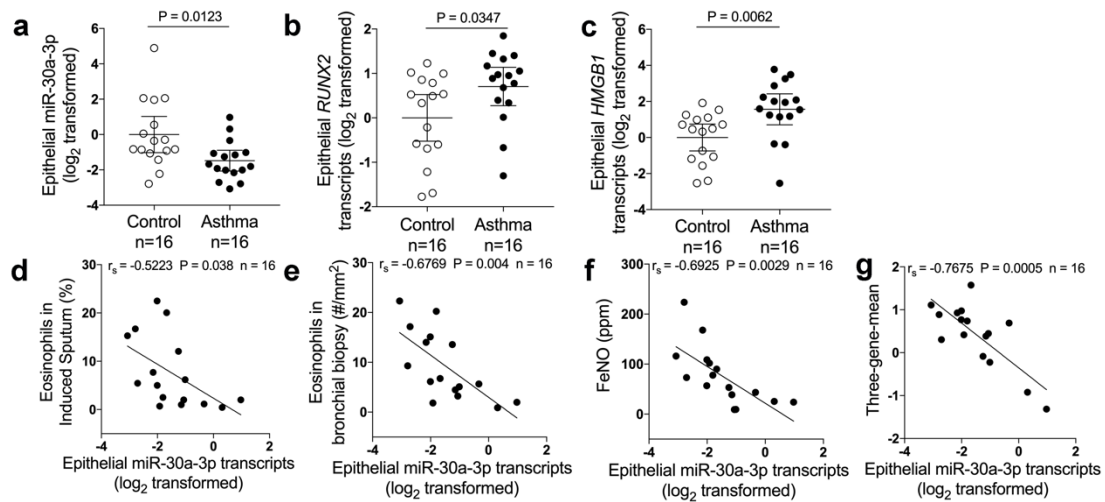

**Figure S5. The expression of miR-30a-3p, RUNX2, HMGB1, and the correlation between miR-30a-3p and airway eosinophilia in 16 asthma patients randomly selected from the cohort of 51 asthma patients.** The expression of miR-30a-3p, RUNX2, HMGB1, and the correlation between miR-30a-3p and airway eosinophilia were re-analyzed in 16 asthma patients randomly selected from the cohort of 51 asthma patients, to avoid the statistical analysis bias that could be caused by the disproportionate sample size of control ( $n = 16$ ) and patients ( $n = 51$ ). Fifty-one asthma patients were labeled (1-51) in the order of recruited time. Online algorithm ([www.cnstat.org/randomization/simple-sampling](http://www.cnstat.org/randomization/simple-sampling)) was used to get sixteen numbers randomly from one to fifty-one. The labeled patients with the same sixteen numbers were compared with controls. **(a-c)** Bronchial brushings from asthma patients ( $n=16$ ) and control subjects ( $n=16$ ) were subjected to quantitative PCR assays of hsa-miR-30a-3p, RUNX2 and HMGB1 transcript levels. The transcript levels were expressed as log<sub>2</sub> transformed and relative to the median value for controls (two-tailed Mann–Whitney test). **(d-g)** Correlation assays between epithelial miR-30a-3p transcript levels and

eosinophils in induced sputum (**d**) and bronchial biopsies (**e**), FeNO (**f**), and three-gene-mean of CLCA1, POSTN and SERPINB2 (**g**) in asthma patients (n=16). Correlation assays were performed using Spearman's rank-order correlation.
